# Supplementary material
Source: PubMed Central journal article supplement (PMC3752233)
Supplement: 1311113110_pnas.201311113SI.pdf [file 1311113110_pnas.201311113SI.pdf]

# Supporting Information

Venkatraman Girija et al. 10.1073/pnas.1311113110

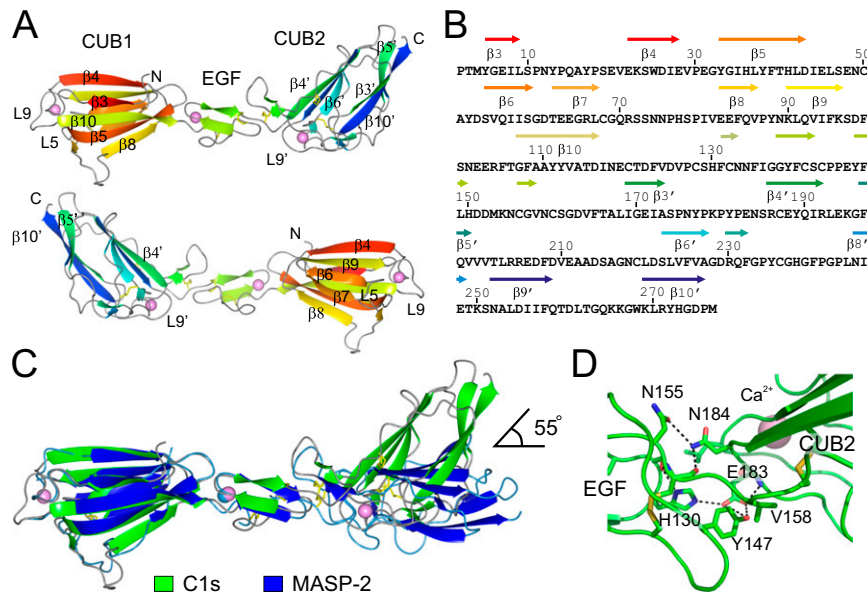

**Fig. S1.** Structure of the complement C1r/C1s, Uegf, and Bmp1 (CUB)1-EGF-CUB2 fragment of C1s. (A and B) Each CUB domain is a  $\beta$ -sandwich with eight  $\beta$ -strands,  $\beta$ 3– $\beta$ 10, linked by loops L2–L9 (following the nomenclature for seminal plasma spermadhesins).  $\text{Ca}^{2+}$  (pink) are positioned between loops L5 and L9 and are coordinated by the side chains of Glu45, Asp53, Asp98, Asn101, the carbonyl oxygen of Ser100, and a water molecule in CUB1 and by the side chains of Glu211, Asp221, Asp260, the main chains of Thr262 and Gly263, and a water molecule in CUB2. A disulphide bond (yellow) links loop L5 to loop L7 in both domains and CUB2 contains an extra disulphide linking loop L2 to strand  $\beta$ 4. The  $\text{Ca}^{2+}$  in the EGF-like domain is coordinated by side chains of Asp116, Glu119, Asn134, the main chain carbonyl oxygens of Phe135 and Gly138, and a water molecule. The domain is stabilized by three disulfide bonds (yellow). (C) The CUB1-EGF domains of C1s (green) align closely with corresponding regions of rat mannan-binding lectin-associated serine protease (MASP)-2 (blue; PDB ID code: 1NTO; rmsd of 1.1 based on 127 C- $\alpha$  atoms) (1), but CUB2 is rotated by  $\sim 55^\circ$ . (D) The EGF-CUB2 interface of C1s is stabilized via a network of hydrogen bonds (dotted lines) and hydrophobic interactions. In particular, Tyr147 of the EGF-like domain is sandwiched between Val158 and Glu183 of the CUB, with the hydroxyl group interacting with the acidic side chain. Additional hydrogen bonds from Asn155 and Cys156 to Asn184 and between His130 and Glu183 further stabilize the domain interface.

1. Feinberg H, et al. (2003) Crystal structure of the CUB1-EGF-CUB2 region of mannan-binding protein associated serine protease-2. *EMBO J* 22(10):2348–2359.

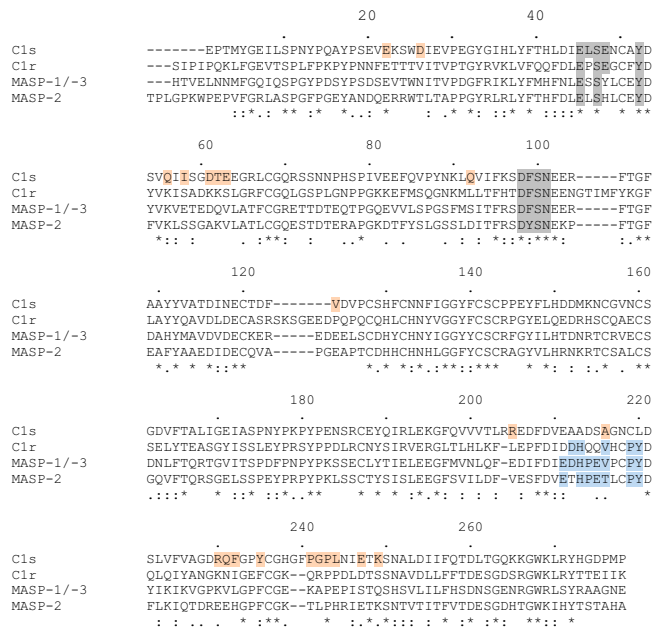

**Fig. S2.** Sequence alignment of the CUB1-EGF-CUB2 domains of human C1s with C1r, MASP-1/-3, and MASP-2. Residues involved in the CUB1-collagen interaction are shaded gray, the CUB2-collagen interaction in blue (from the structure of CUB2 of MASP-1 bound to a collagen-like peptide from mannan-binding lectin; ref. 1), and the C1s-C1s interface in orange. Numbering refers to C1s.

1. Gingras AR, et al. (2011) Structural basis of mannan-binding lectin recognition by its associated serine protease MASP-1: Implications for complement activation. *Structure* 19(11): 1635-1643.



**Table S1. Data collection and refinement statistics**

|                                                     | C1s collagen complex  | C1s tetramer           | C1s CUB2-CCP1                                  | C1s CUB2-CCP1-CCP2     |
|-----------------------------------------------------|-----------------------|------------------------|------------------------------------------------|------------------------|
| <b>Data collection</b>                              |                       |                        |                                                |                        |
| Beam line                                           | Diamond I04-1         | Diamond I04-1          | Diamond I04-1                                  | Diamond I04            |
| Space group                                         | C 1 2 1               | P 1 2 <sub>1</sub> 1   | P 2 <sub>1</sub> 2 <sub>1</sub> 2 <sub>1</sub> | C 1 2 1                |
| <i>a</i> , <i>b</i> , <i>c</i> , Å                  | 71.3, 71.2, 98.4      | 67.9, 71.7, 157.7      | 66.5 69.2 76.7                                 | 143.0 58.6 51.2        |
| $\alpha$ , $\beta$ , $\gamma$ , °                   | 90, 111.1, 90         | 90, 95.9, 90           | 90, 90, 90                                     | 90 91.1 90             |
| Resolution, Å                                       | 48.57–2.50 (2.59–2.5) | 67.51–2.92 (3.03–2.92) | 30.0–1.97 (2.12–1.97)                          | 54.22–2.92 (2.95–2.92) |
| <i>R</i> <sub>sym</sub>                             | 8.2 (48.9)            | 12.3 (51.4)            | 2.7 (30.9)                                     | 8.4 (32.9)             |
| <i>I</i> / $\sigma$ <i>I</i>                        | 12.8 (2.7)            | 9.60 (2.1)             | 33.3 (5.6)                                     | 5.69 (2.1)             |
| Completeness                                        | 93.2 (82.1)           | 98.9 (94.2)            | 99.3 (97.2)                                    | 94.8 (94.9)            |
| Redundancy                                          | 3.9 (3.6)             | 6.6 (3.9)              | 6.4 (6.6)                                      | 2.8 (2.6)              |
| <b>Refinement</b>                                   |                       |                        |                                                |                        |
| Resolution, Å                                       | 48.57–2.50            | 67.51–2.92             | 28.49–1.97                                     | 54.22–2.92             |
| No. of reflections                                  | 14,978 (1,572)        | 32,700 (3,003)         | 24,501 (2,328)                                 | 9,504 (1,368)          |
| <i>R</i> <sub>work</sub> / <i>R</i> <sub>free</sub> | 0.195/0.251           | 0.208/0.252            | 0.179/0.217                                    | 0.271/0.293            |
| No. of atoms                                        | 2,703                 | 8,768                  | 1,610                                          | 1,908                  |
| Protein                                             | 2,653                 | 8,752                  | 1,463                                          | 1,908                  |
| Ligand/ion                                          | 5                     | 16                     | 1                                              | —                      |
| Water                                               | 47                    | —                      | 146                                            | —                      |
| B factors, Å <sup>2</sup>                           | 48.4                  | 46.50                  | 52.00                                          | 132.20                 |
| Protein                                             | 48.2                  | 46.50                  | 51.70                                          | 132.20                 |
| Ligand/ion                                          | 45.3                  | —                      | 38.80                                          | —                      |
| Water                                               | 43.4                  | —                      | 55.40                                          | —                      |
| <b>rms deviations</b>                               |                       |                        |                                                |                        |
| Bond lengths, Å                                     | 0.011                 | 0.003                  | 0.007                                          | 0.004                  |
| Bond angles, °                                      | 0.86                  | 0.77                   | 1.12                                           | 0.96                   |

The highest resolution shell is shown in parenthesis.
